# Supplementary material for: New Thiosemicarbazide Derivatives with Multidirectional Biological Action
Source: MDPI journal article supplement (doi:10.3390/molecules29071529), 2024-03-29
Supplement: s1 [file s1]

## Supplementary material

Patryk Lasek<sup>1</sup>, Urszula Kosikowska<sup>2</sup>, Przemysław Kołodziej<sup>3</sup>, Grażyna Kubiak-Tomaszewska<sup>4</sup>, Natalia Krzyżanowska<sup>3</sup>, Tomasz Szostek<sup>4</sup>, Marta Struga<sup>4</sup>, Marcin Feldo<sup>5</sup>, Anna Bogucka-Kocka<sup>3</sup>, Monika Wujec<sup>6\*</sup>,

<sup>1</sup>Doctoral School, Medical University of Lublin, Chodzki 7, 20-093 Lublin, Poland; lasekpatryk2@gmail.com

<sup>2</sup>Department of Pharmaceutical Microbiology, Faculty of Pharmacy, Medical University, 20-093 Lublin, Poland; urszula.kosikowska@umlub.pl

<sup>3</sup>Department of Biology and Genetics, Faculty of Pharmacy, Medical University of Lublin, 4A Chodzki Street, 20-093 Lublin, Poland; przemyslawkolodziej@umlub.pl, natalia.krzyzanowska97@gmail.com, anna.bogucka-kocka@umlub.pl

<sup>4</sup>Department of Biochemistry, Medical University of Warsaw, 02-097 Warszawa, Poland; grazyna.kubiak-tomaszewska@wum.edu.pl, tomasz.szostek@wum.edu.pl; marta.struga@wum.edu.pl

<sup>5</sup>Department of Vascular Surgery, Medical University of Lublin, Staszica 11 St., 20-081 Lublin, Poland, marcin.feldo@umlub.pl

<sup>6</sup>Department of Organic Chemistry, Faculty of Pharmacy, Medical University of Lublin, 4A Chodzki Street, 20-093 Lublin, Poland

\*Correspondence: monika.wujec@umlub.pl (M.W.)

## Content

|    |                                                                        |    |
|----|------------------------------------------------------------------------|----|
| 1. | <sup>1</sup> H NMR spectra of the compounds.....                       | 2  |
| 2. | <sup>13</sup> C NMR spectra for the compounds.....                     | 9  |
| 3. | <sup>19</sup> F NMR spectra for compounds <b>3a</b> and <b>4</b> ..... | 15 |

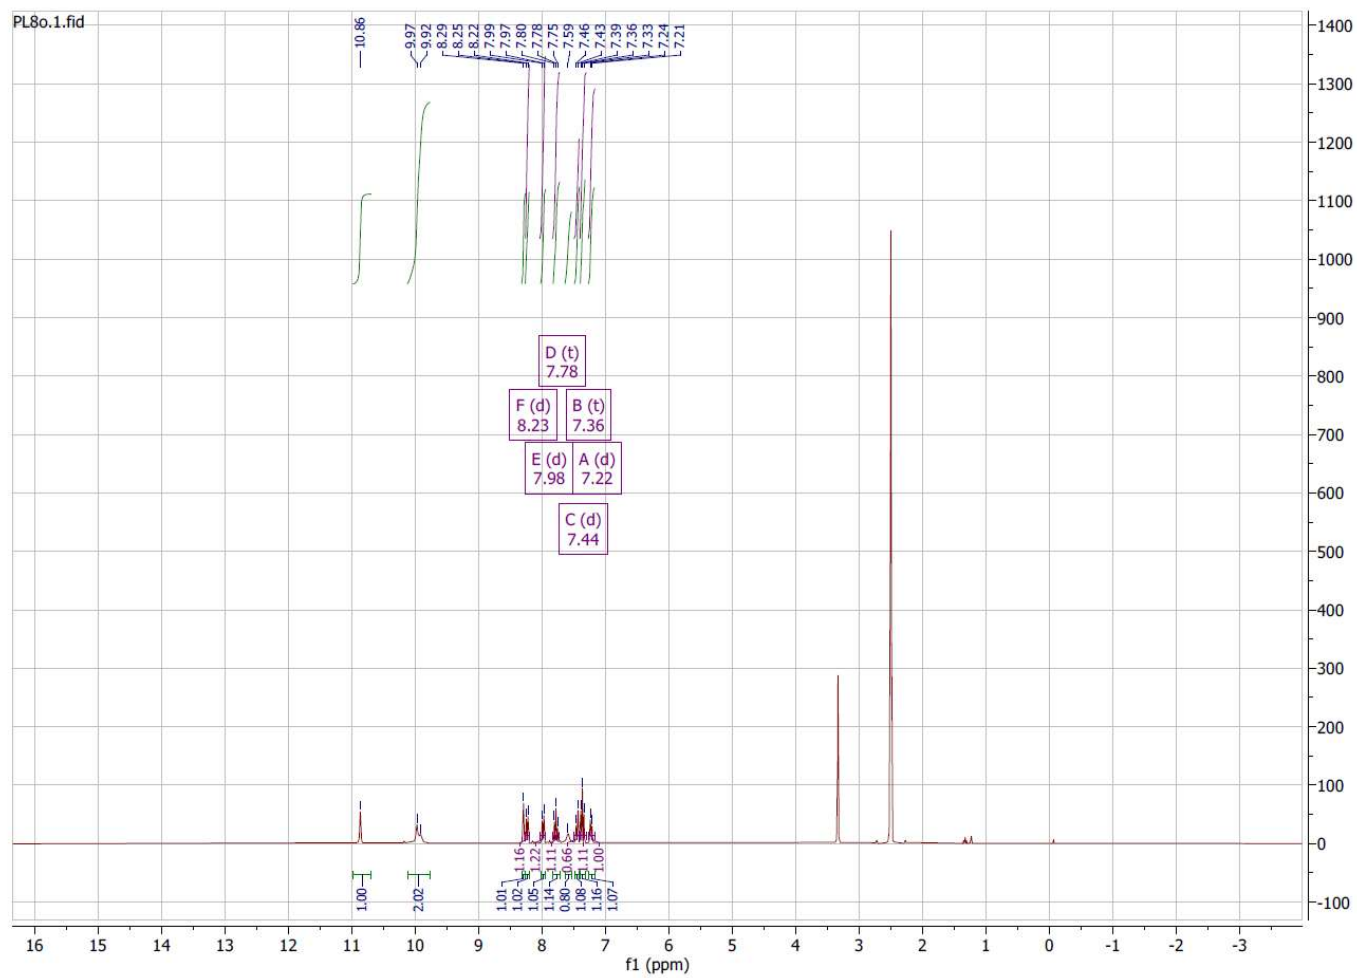

**Figure S1.** The  $^1\text{H}$  NMR of compound **3a**.

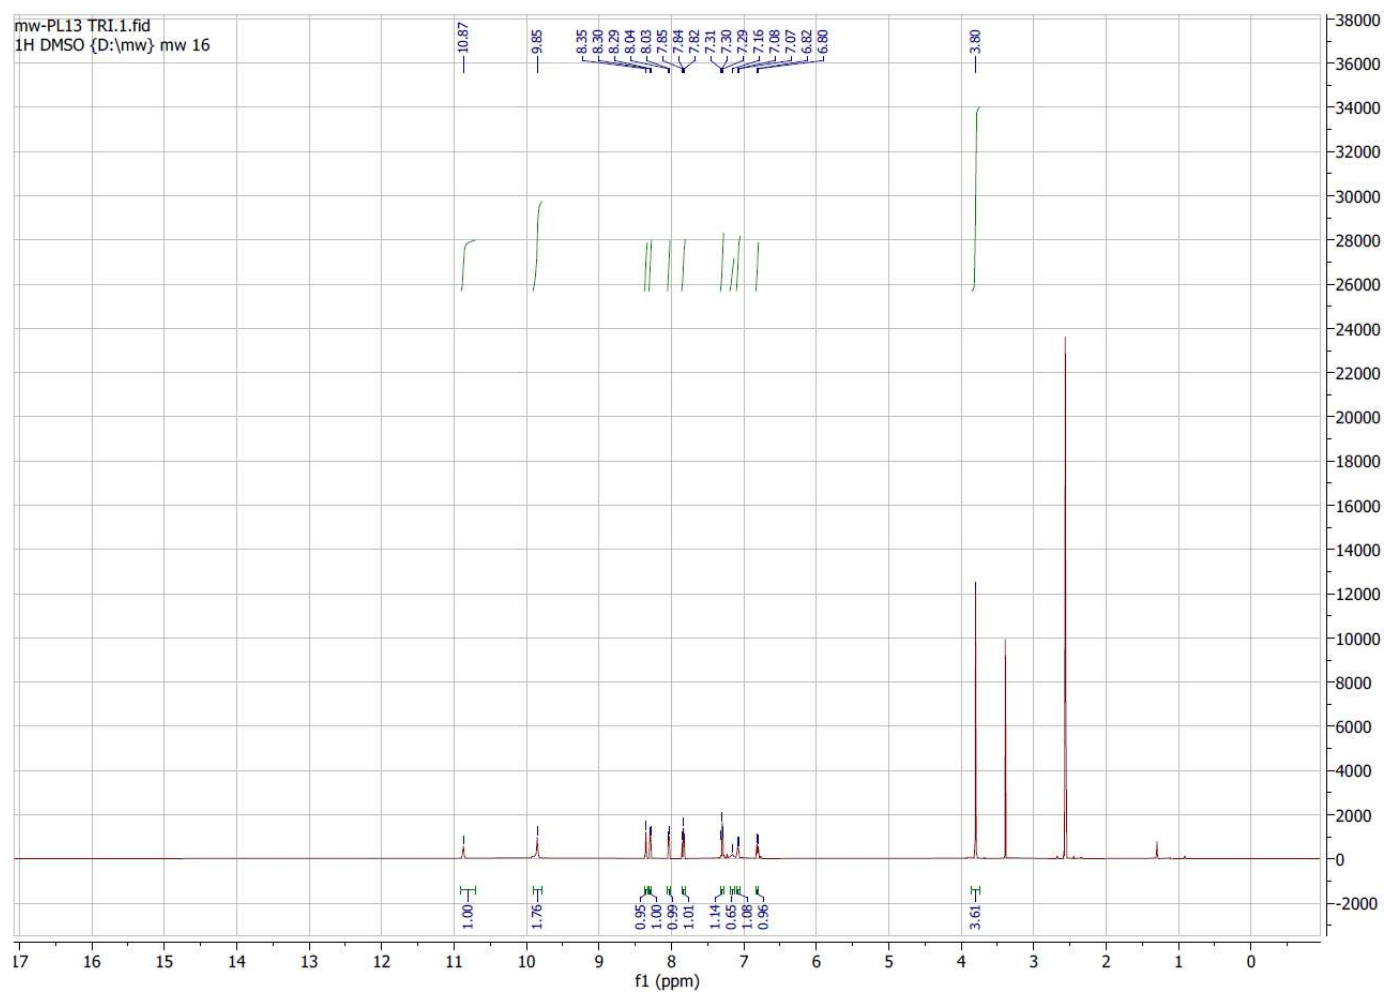

**Figure S2.** The  $^1\text{H}$  NMR of compound **3b**.

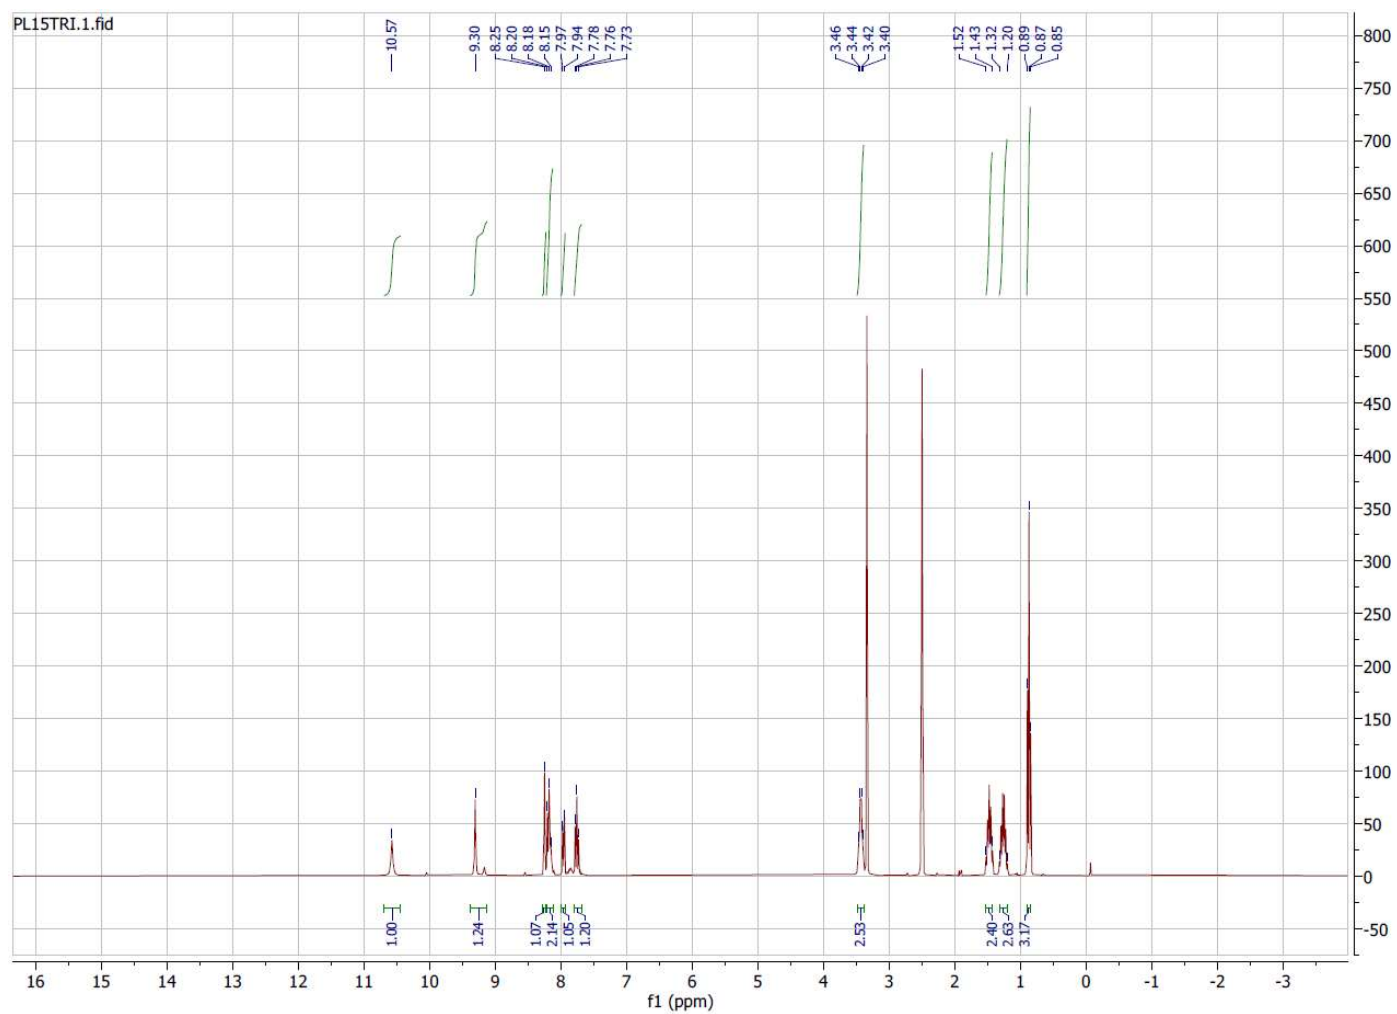

**Figure S3.** The  $^1\text{H}$  NMR of compound **3c**.

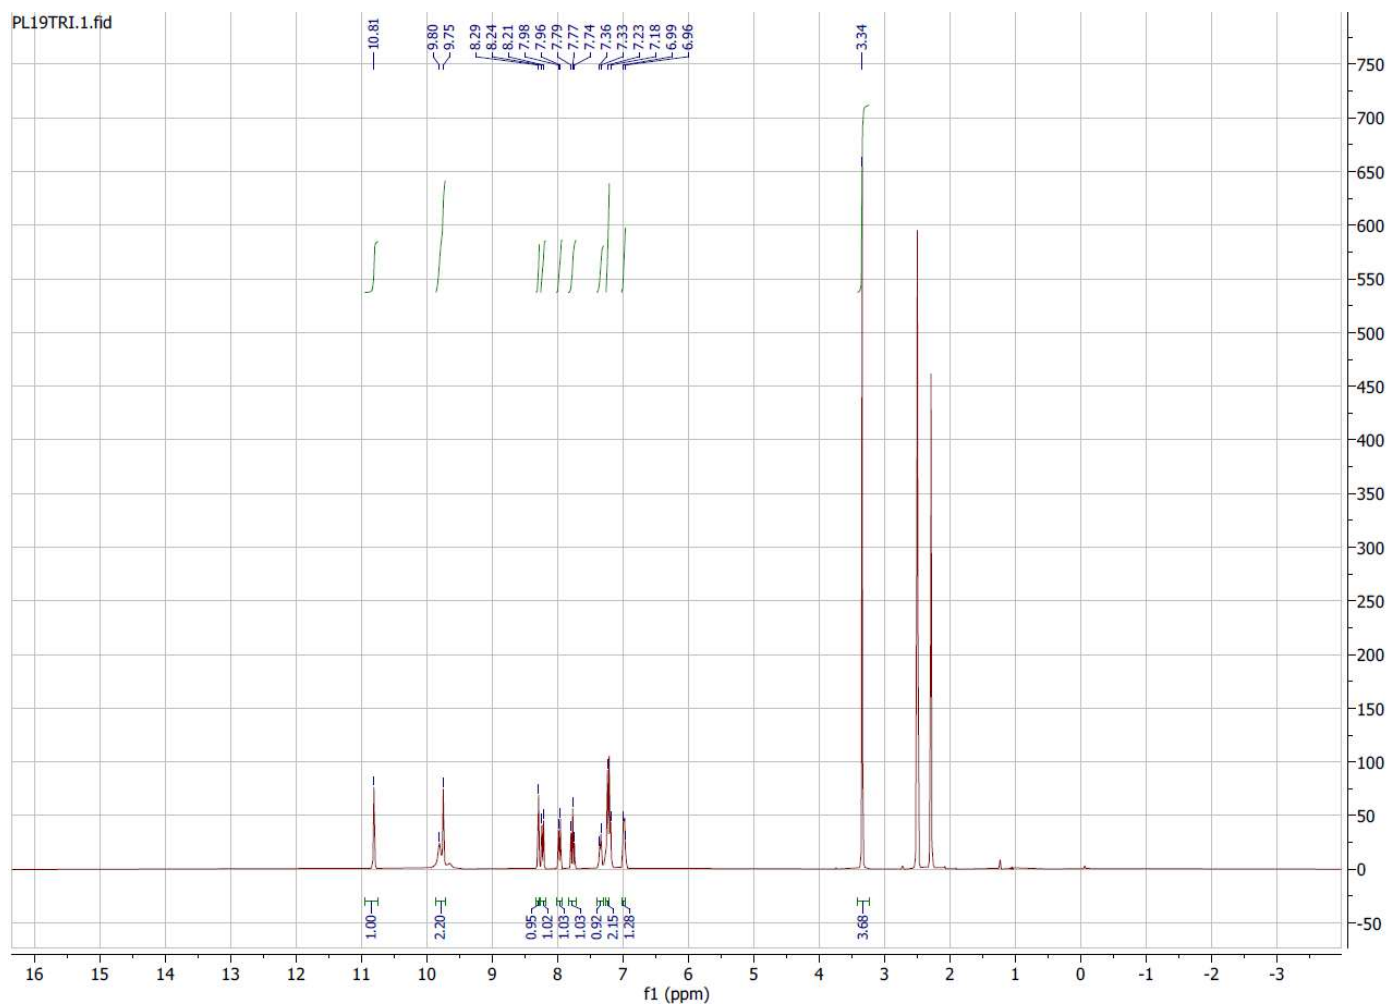

**Figure S4.** The  $^1\text{H}$  NMR of compound **3d**.

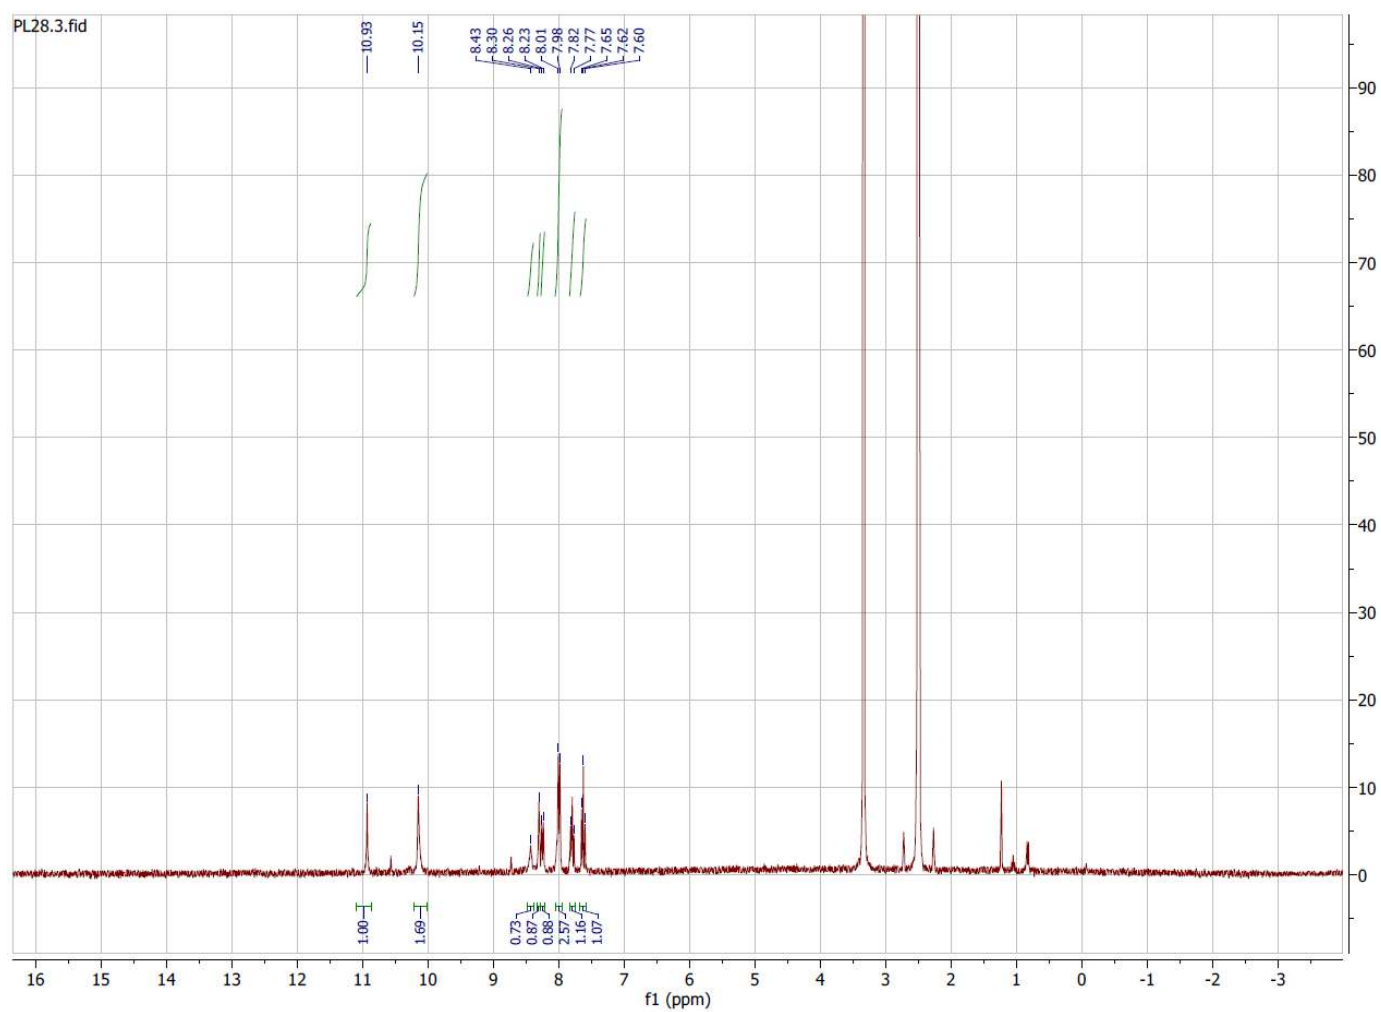

Figure S5. The  $^1\text{H}$  NMR of compound **3e**.

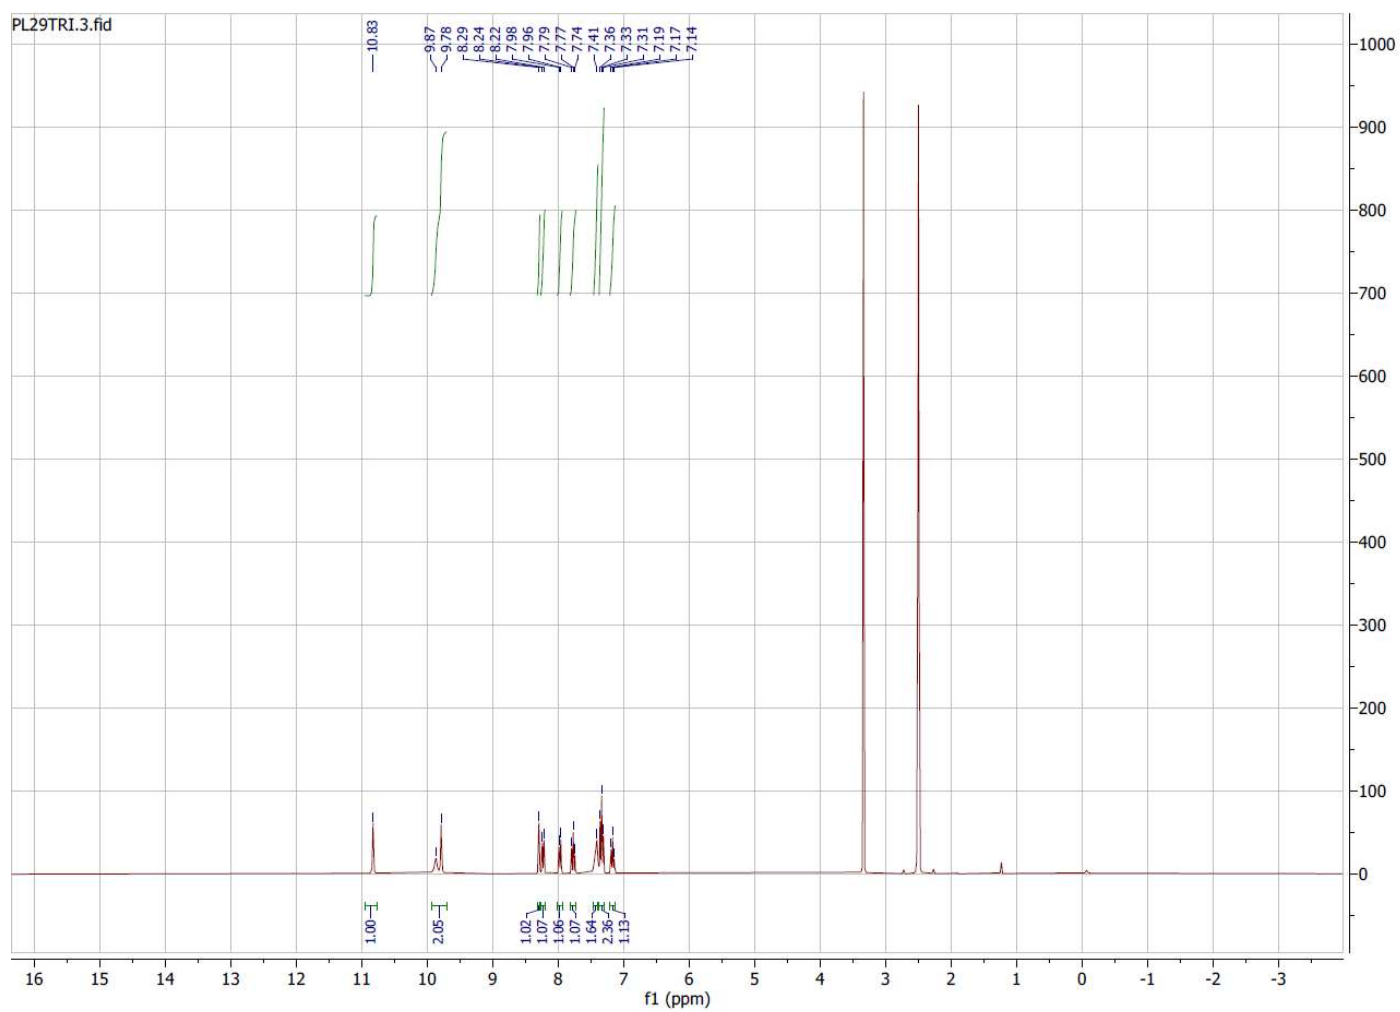

**Figure S6.** The  $^1\text{H}$  NMR of compound **3f**.

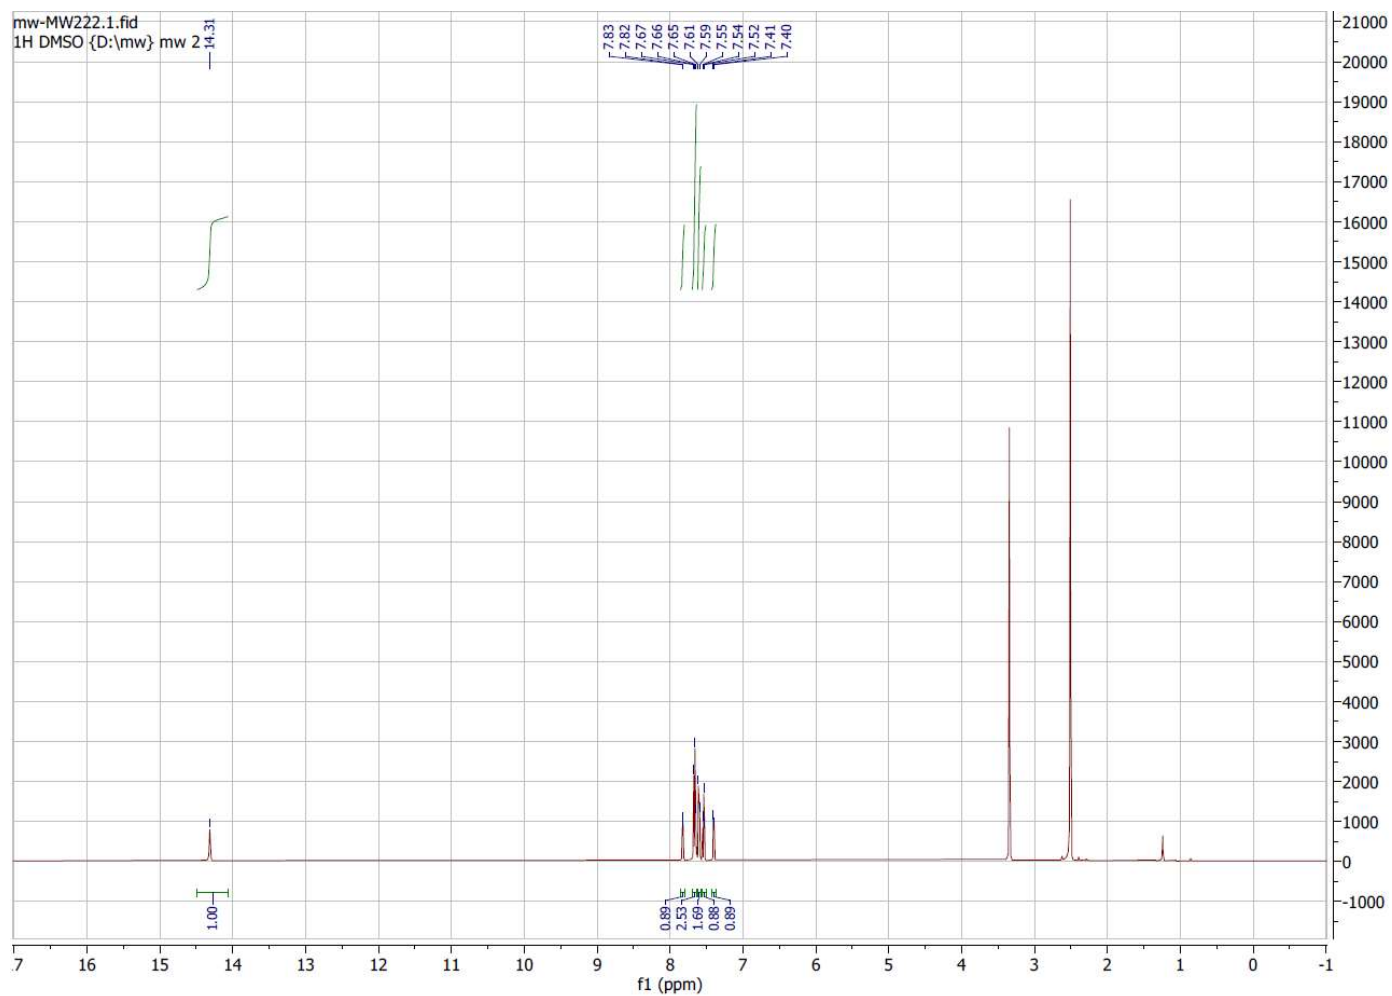

**Figure S7.** The  $^1\text{H}$  NMR of compound **4**.



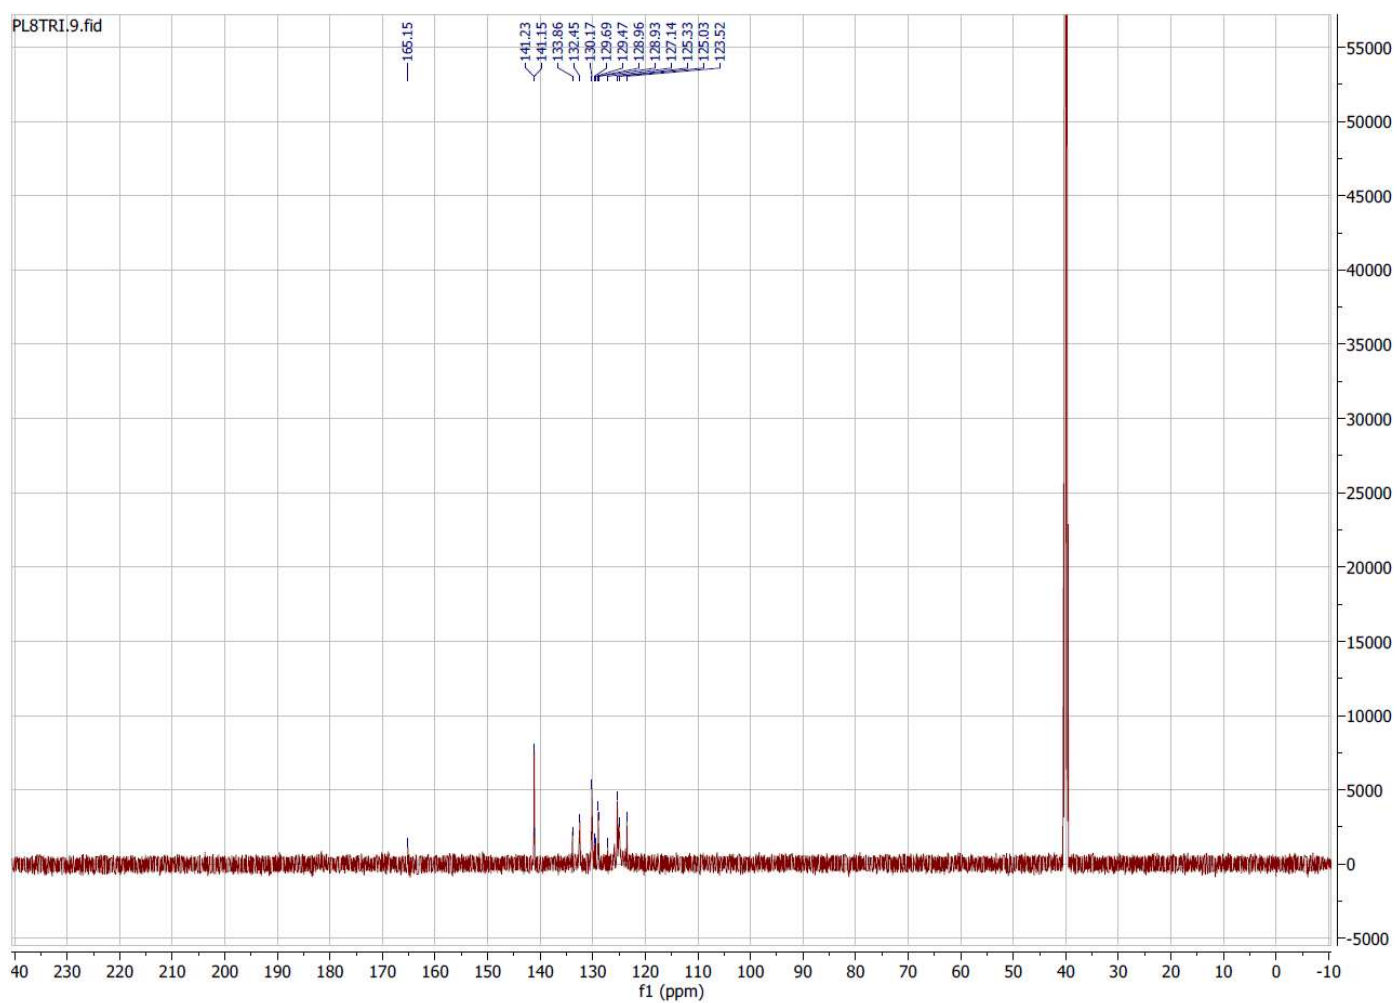

**Figure S8.** The  $^{13}\text{C}$  NMR of compound **3a**.

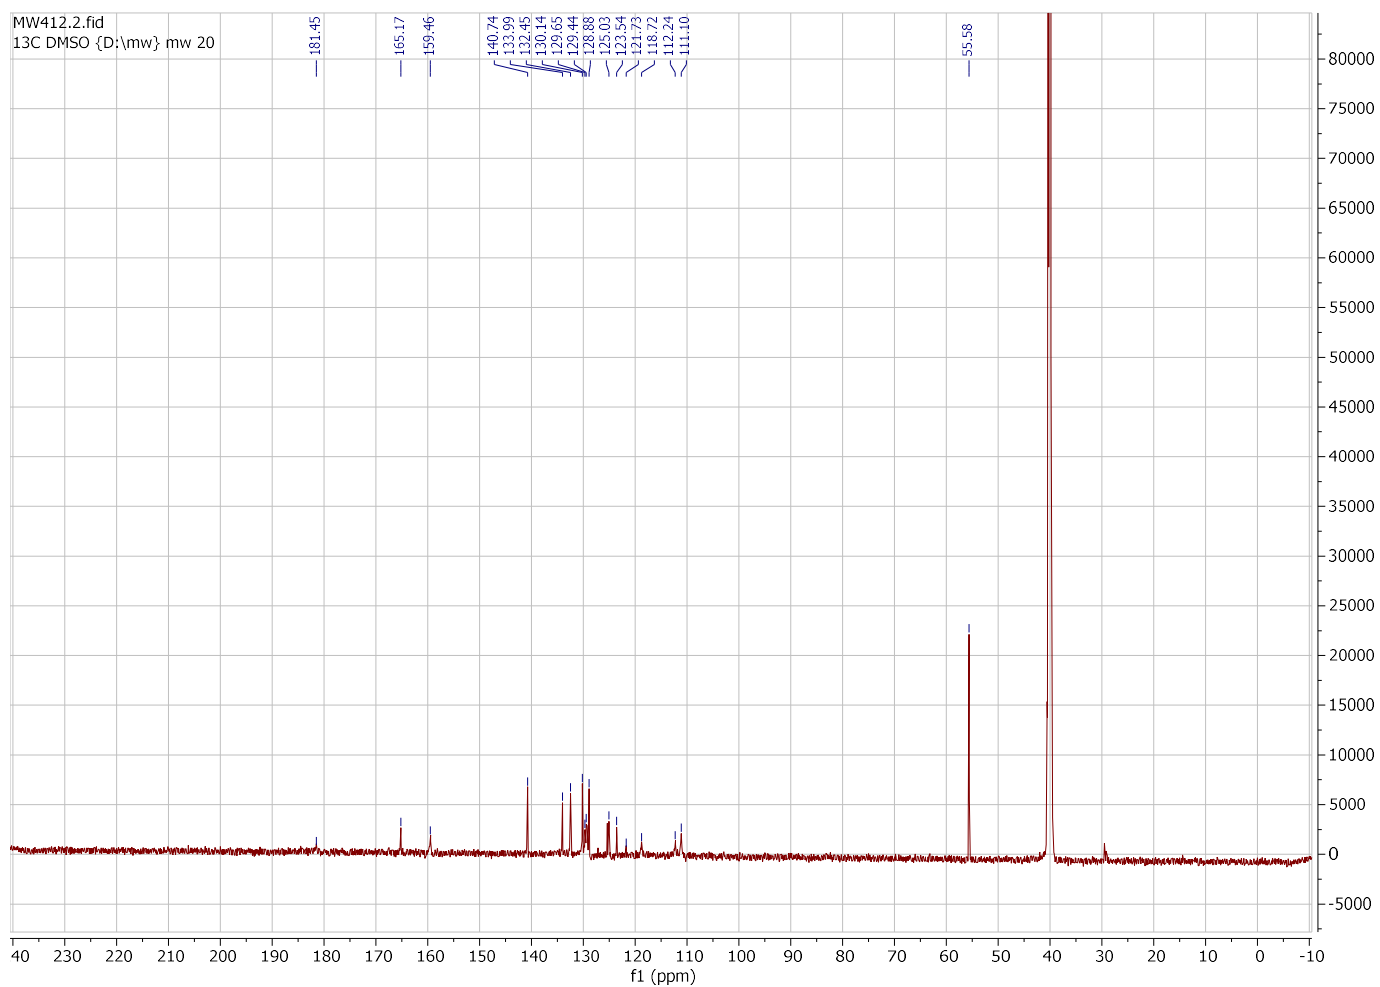

**Figure S9.** The  $^{13}\text{C}$  NMR of compound **3b**.

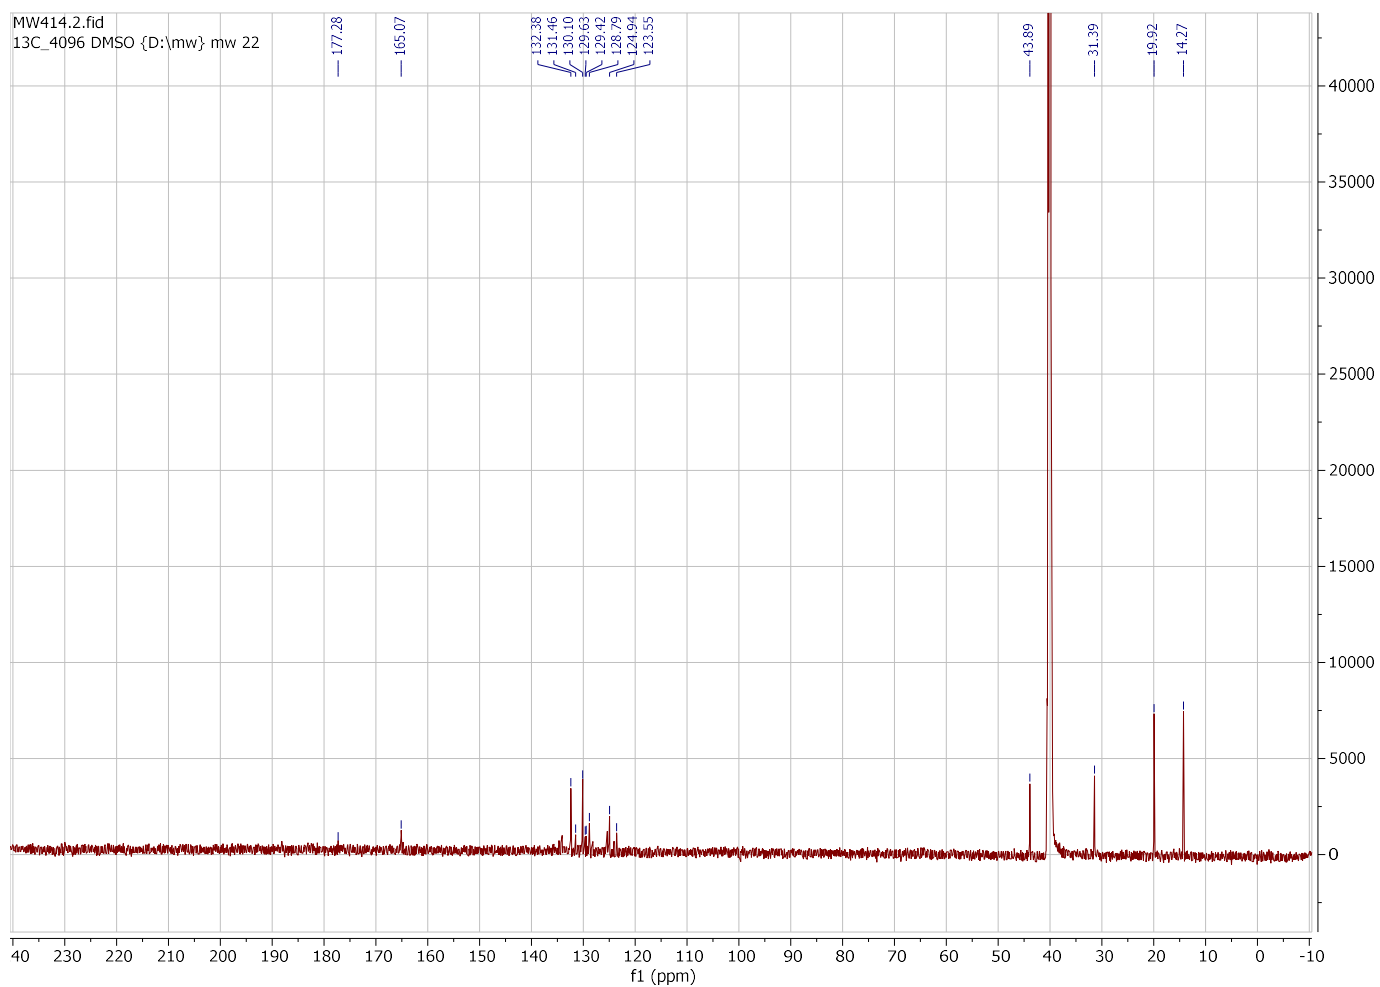

**Figure S10.** The  $^{13}\text{C}$  NMR of compound **3c**.

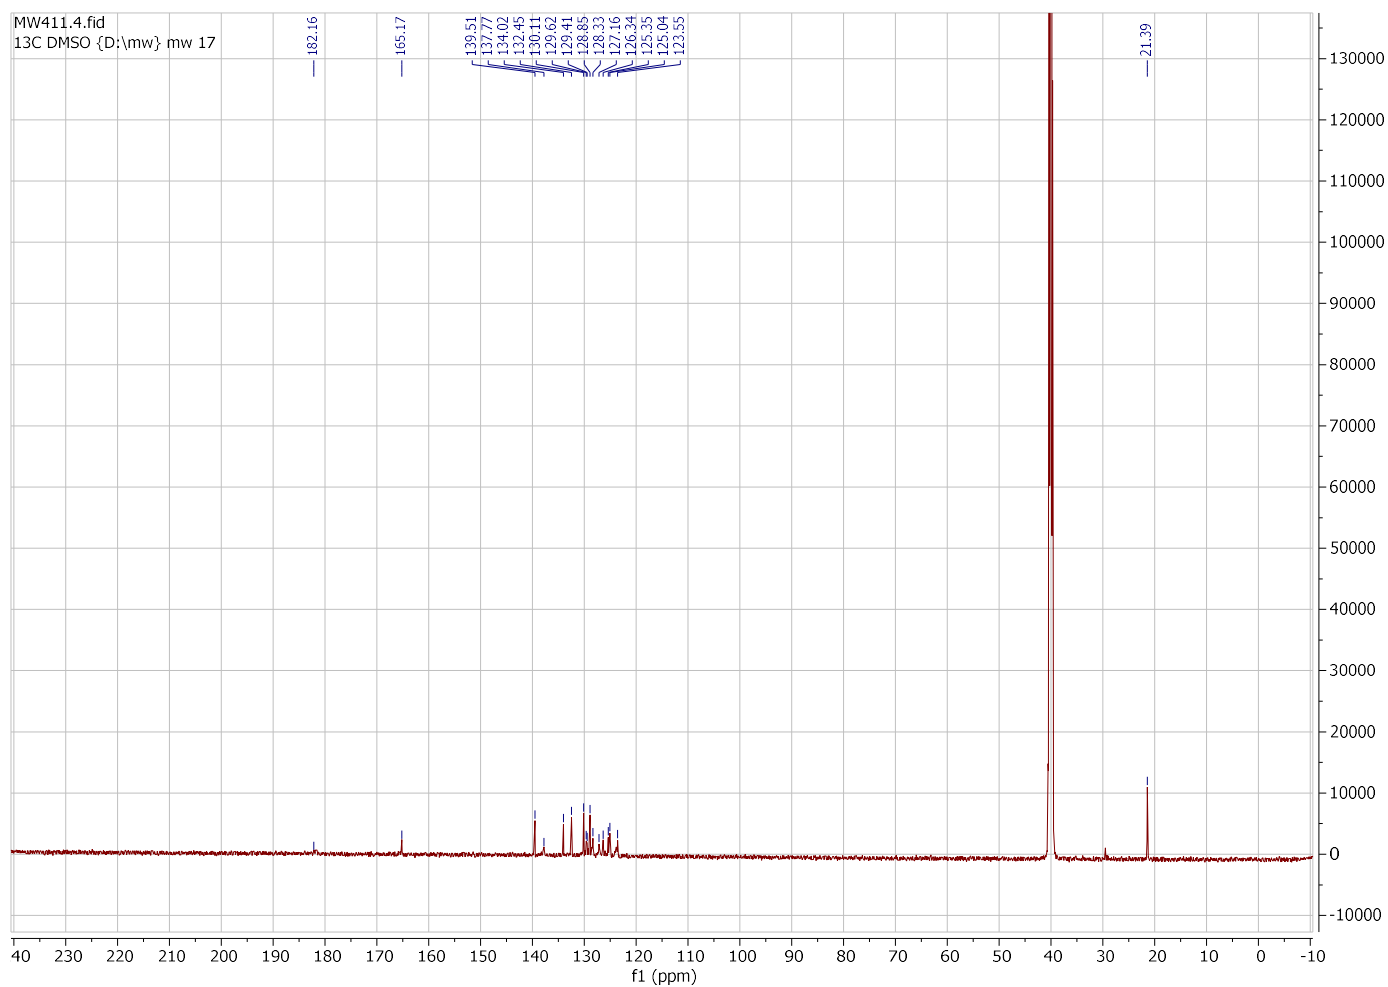

**Figure S11.** The  $^{13}\text{C}$  NMR of compound **3d**.

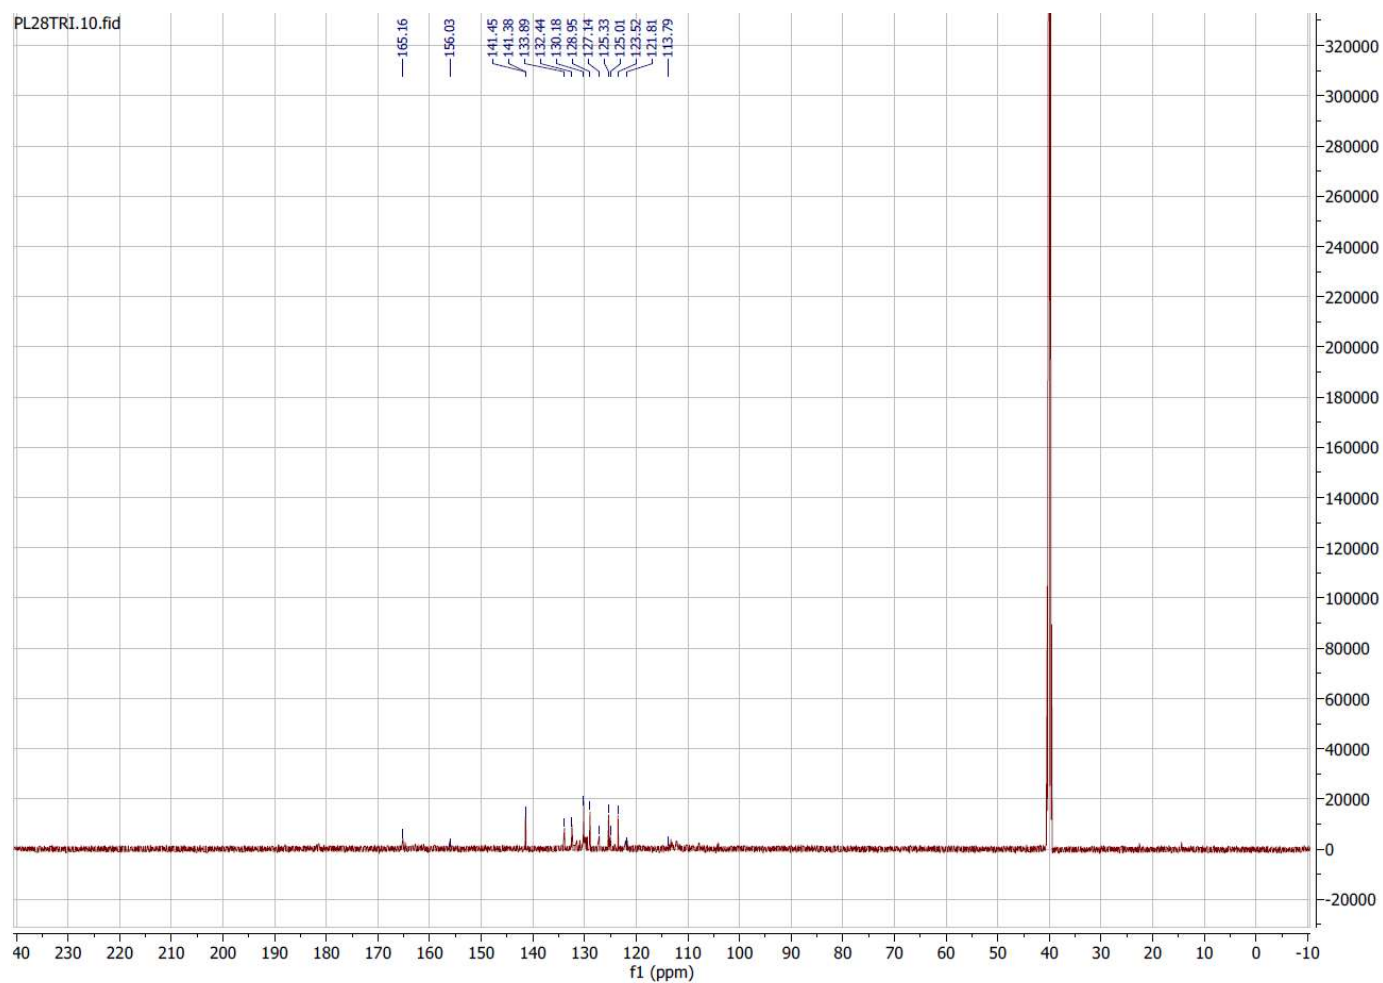

**Figure S12.** The  $^{13}\text{C}$  NMR of compound **3e**.

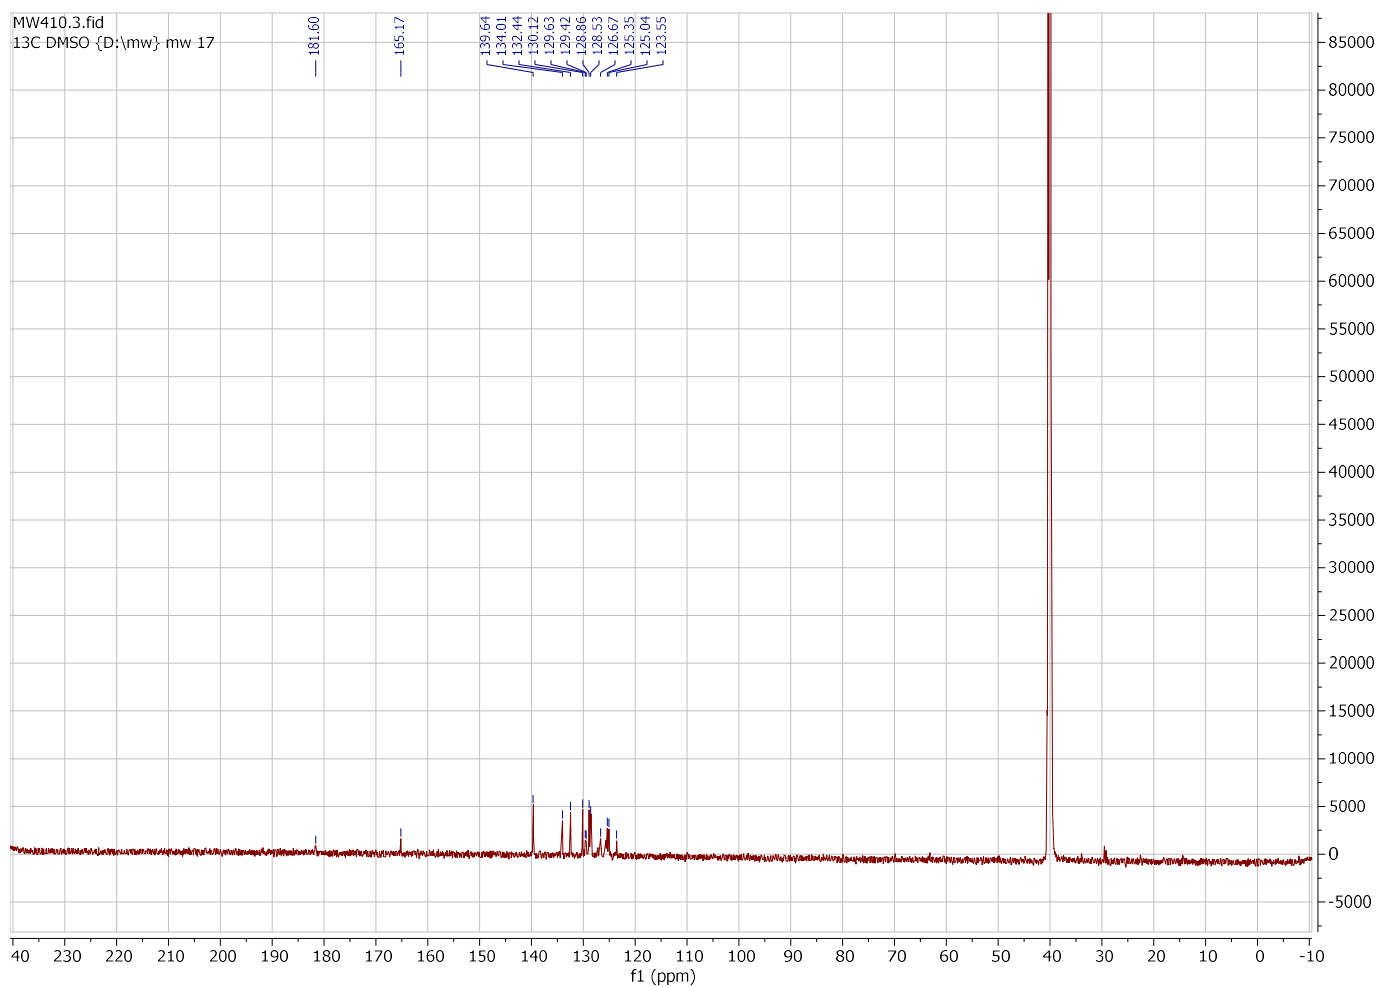

**Figure S13.** The  $^{13}\text{C}$  NMR of compound **3f**.

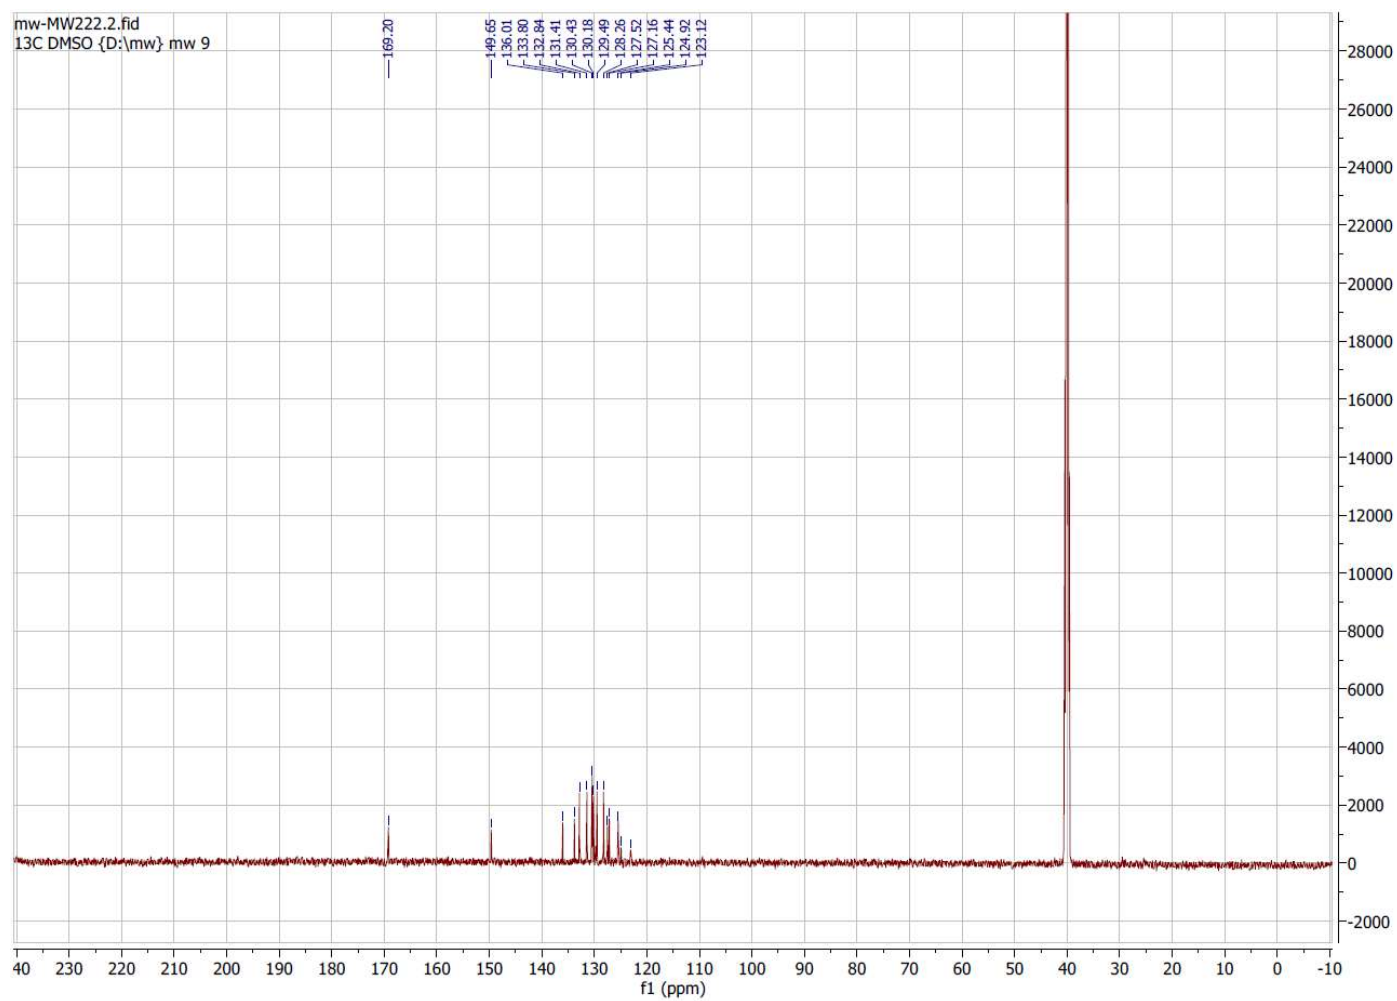

Figure S14. The  $^{13}\text{C}$  NMR of compound 4.

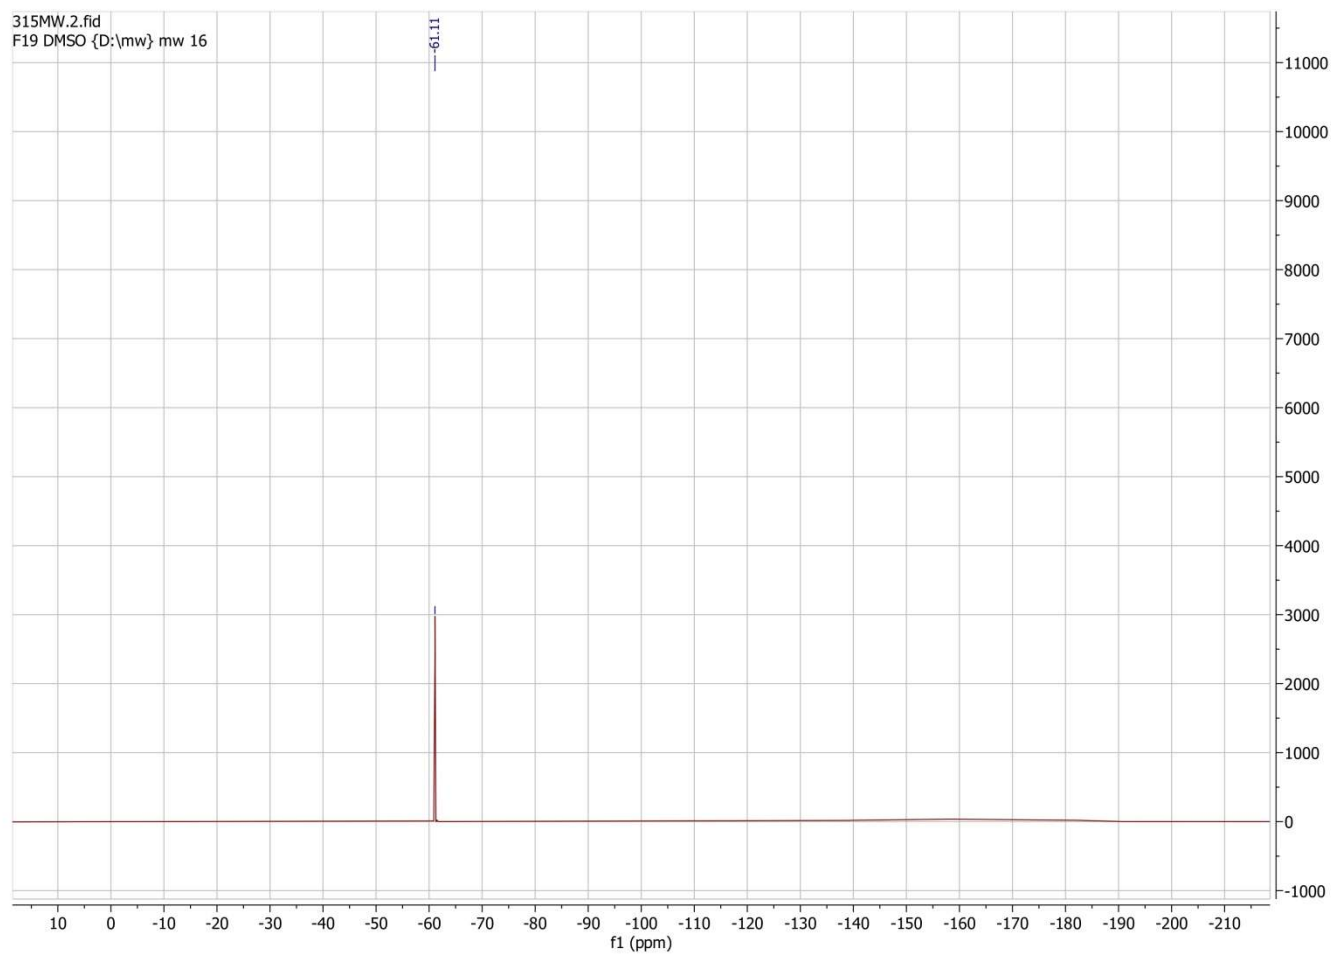

**Figure S15.** The  $^{19}\text{F}$  NMR of compound **3a**.



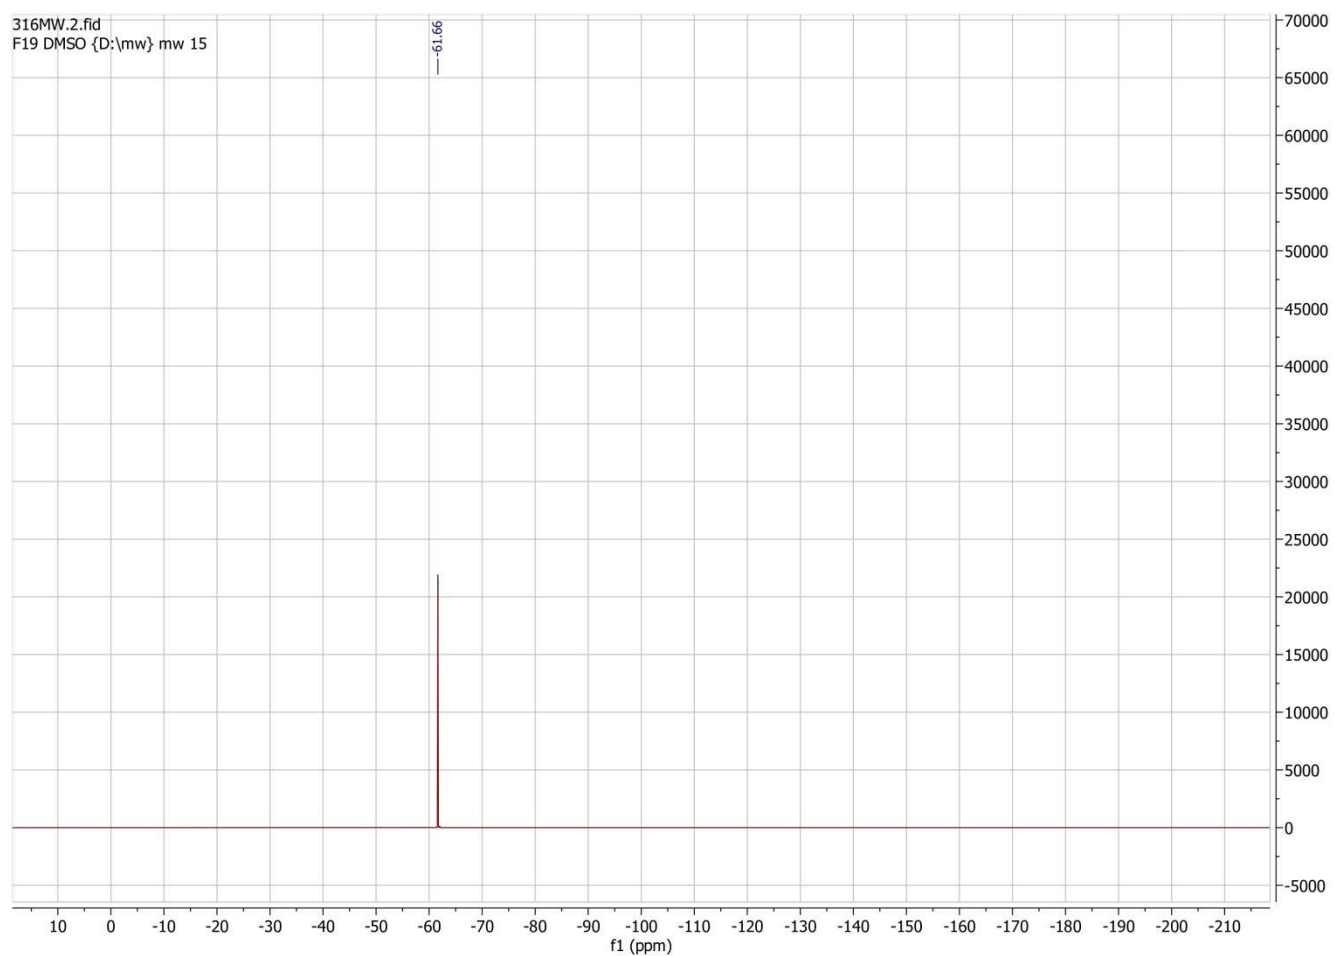

**Figure S16.** The  $^{19}\text{F}$  NMR of compound **4**.
